# Supplementary material for: Enrichment of Large-Diameter Single-Walled Carbon Nanotubes (SWNTs) with Metallo-Octaethylporphyrins
Source: Materials (Basel). 2013 Jul 24;6(8):3064–78. doi: 10.3390/ma6083064 (PMC5521234; doi:10.3390/ma6083064)
Supplement: Supplementary file 1 [file materials-06-03064-s001.pdf]

Article

## Supplementary Information

### 1. Deconvolution of Raman Spectra

**Figure S1.** Deconvolution of Raman spectra (Figure 6) of 76-CoMoCAT (a) before and after extraction with ZnOEP (b) and MnOEP (c).

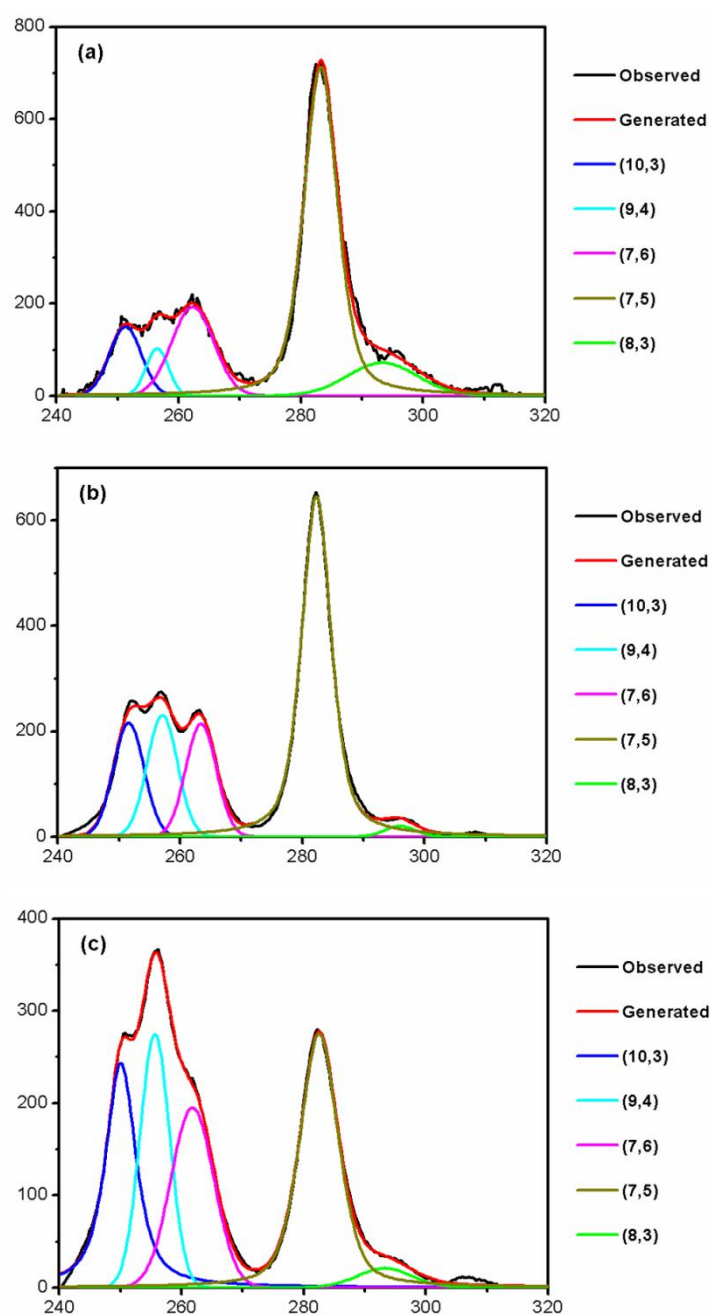

**Table S1.**  $(n,m)$  Abundance estimated from PL spectra of semiconducting SWNTs before and after extraction of HiPCO with ZnOEP and MnOEP.

| Major $(n, m)$<br>components in<br>HiPCO | Diameter<br>(nm) | Roll-up<br>angle<br>(degree/°) | Abundance (%) estimated from PL spectra |                          |                          |
|------------------------------------------|------------------|--------------------------------|-----------------------------------------|--------------------------|--------------------------|
|                                          |                  |                                | HiPCO                                   | Extraction with<br>ZnOEP | Extraction with<br>MnOEP |
| (7,5)                                    | 0.83             | 24.5                           | 2.7%                                    | 3.0%                     | 9.5%                     |
| (10,2)                                   | 0.88             | 9.0                            | 3.6%                                    | 2.9%                     | 3.6%                     |
| (8,4)                                    | 0.84             | 19.1                           | 3.5%                                    | 6.7%                     | 5.4%                     |
| (7,6)                                    | 0.90             | 27.5                           | 5.8%                                    | 11.3%                    | 8.0%                     |
| (9,4)                                    | 0.92             | 17.5                           | 6.4%                                    | 10.3%                    | 13.8%                    |
| (8,6)                                    | 0.97             | 25.3                           | 11.2%                                   | 13.8%                    | 13.7%                    |
| (12,1)                                   | 0.99             | 4                              | 5.1%                                    | 5.4%                     | 6.3%                     |
| (11,3)                                   | 1.01             | 11.7                           | 8.8%                                    | 4.8%                     | 5.7%                     |
| (9,5)                                    | 0.98             | 20.6                           | 6.9%                                    | 8.8%                     | 6.7%                     |
| (8,7)                                    | 1.03             | 27.8                           | 12.9%                                   | 9.5%                     | 7.5%                     |
| (10,5)                                   | 1.05             | 19.1                           | 11.9%                                   | 8.9%                     | 9.8%                     |
| (9,7)                                    | 1.10             | 25.9                           | 12.7%                                   | 6.7%                     | 4.6%                     |
| (10, 6)                                  | 1.11             | 21.8                           | 6.7%                                    | 4.1%                     | 3.3%                     |
| (9,8)                                    | 1.17             | 28.0                           | 5.4%                                    | 3.6%                     | 2.2%                     |

© 2013 by the authors; licensee MDPI, Basel, Switzerland. This article is an open access article distributed under the terms and conditions of the Creative Commons Attribution license (<http://creativecommons.org/licenses/by/3.0/>).
